# Supplementary material for: Pesticide Exposure and Bone Tumors: A Systematic Review
Source: Research Square preprint supplement (doi:10.21203/rs.3.rs-6369910/v1), 2025-05-08
Supplement: Supplementary file 1 [file 5e32a3b84e7d6d4cadccc70c.docx]

| **Characteristic** | **Description** |
| --- | --- |
| **Study Design** | 12 case-control studies; 8 cohort studies; 1 ecological study |
| **Geographical Distribution** | United States (n=8), Canada (n=3), Europe (n=6), Australia (n=2) |
| **Sample Size** | Ranged from 50 to over 1,000 participants; total approximately 5,600 |
| **Age Range** | Most focused on children/adolescents aged 0-19 years; some included adults up to age 40 |
| **Pesticide Exposure Assessment** | Varied from self-reported questionnaires to biomonitoring techniques |

Table 1: The characteristics of the included studies
